# Supplementary material
Source: Royal Society of Chemistry journal article supplement (doi:10.1039/d6tc00654j)
Supplement: d6tc00654j1.pdf [file d6tc00654j1.pdf]

Supplementary Information

**A one-step flash microwave synthesis of complex high dielectric nanoperovskites applied to microwave gas sensing of ammonia**

Léo SIMON<sup>a</sup>, Alexis LASSERRE<sup>a</sup>, Frédéric DEMOISSON<sup>a</sup>, Jérôme ROSSIGNOL<sup>a</sup>,

Baptiste HENRIOT<sup>a</sup>, Didier STUERGA<sup>a</sup>

<sup>a</sup> GERM, Interfaces dept, Laboratoire Interdisciplinaire Carnot de Bourgogne ICB UMR 6303, Université Bourgogne Europe, CNRS, 21000 Dijon, France

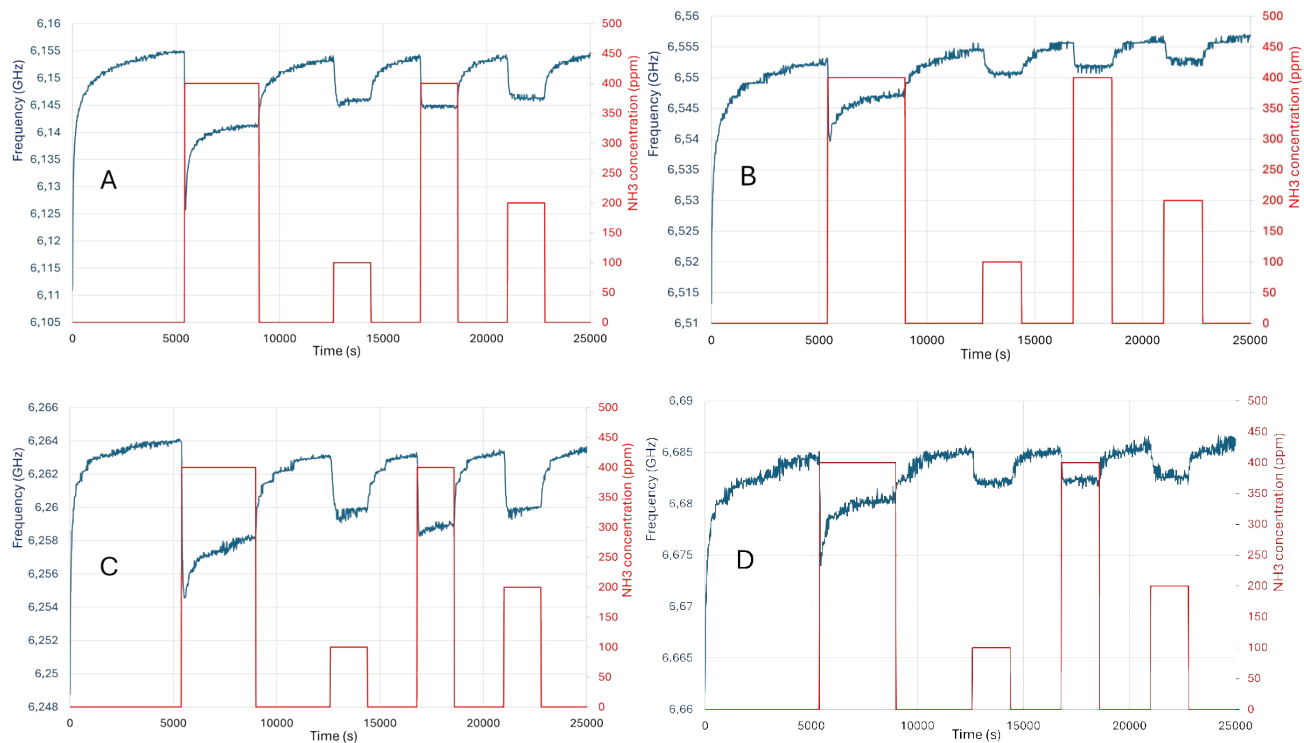

Figure S1: Evolution of the resonance frequency (blue) and ammonia concentration (red) versus time for A) SrTiO<sub>3</sub>, B) Ba<sub>0.6</sub>Sr<sub>0.4</sub>TiO<sub>3</sub>, C) TiO<sub>2</sub> and D) BaTiO<sub>3</sub> sensitive material

## Supplementary Information
